# Supplementary material for: Bioinspired antifouling and antibacterial polymer coating with intrinsic self-healing property
Source: Royal Society of Chemistry journal article supplement (doi:10.1039/d2bm01055k), 2022-11-03
Supplement: d2bm01055k1.pdf [file d2bm01055k1.pdf]

## SUPPLEMENTARY INFORMATION

### Bioinspired Antifouling and Antibacterial Polymer Coating with Intrinsic Self-healing Property

Anika Benozir Asha<sup>†</sup>, Artjima Ounkaew<sup>†</sup>, Yi-Yang Peng<sup>†</sup>, Mohammad Reza Gholipour<sup>¶</sup>,  
Kazuhiko Ishihara<sup>‡</sup>, Yang Liu<sup>¥</sup>, Ravin Narain<sup>†,\*</sup>

<sup>†</sup>*Department of Chemical and Materials Engineering, University of Alberta, Edmonton, Alberta  
T6G 2G6, Canada*

<sup>¥</sup>*Department of Civil and Environment Engineering, University of Alberta, Edmonton, Alberta  
T6G 2G6, Canada*

<sup>¶</sup>*Anton Paar Canada Inc. 4920 Place Olivia, Montreal, Quebec, H4R 2Z8, Canada*

<sup>‡</sup>*Department of Materials Engineering, School of Engineering, The University of Tokyo, 7-3-1  
Hongo, Bunkyo-ku, Tokyo 113-8656, Japan*

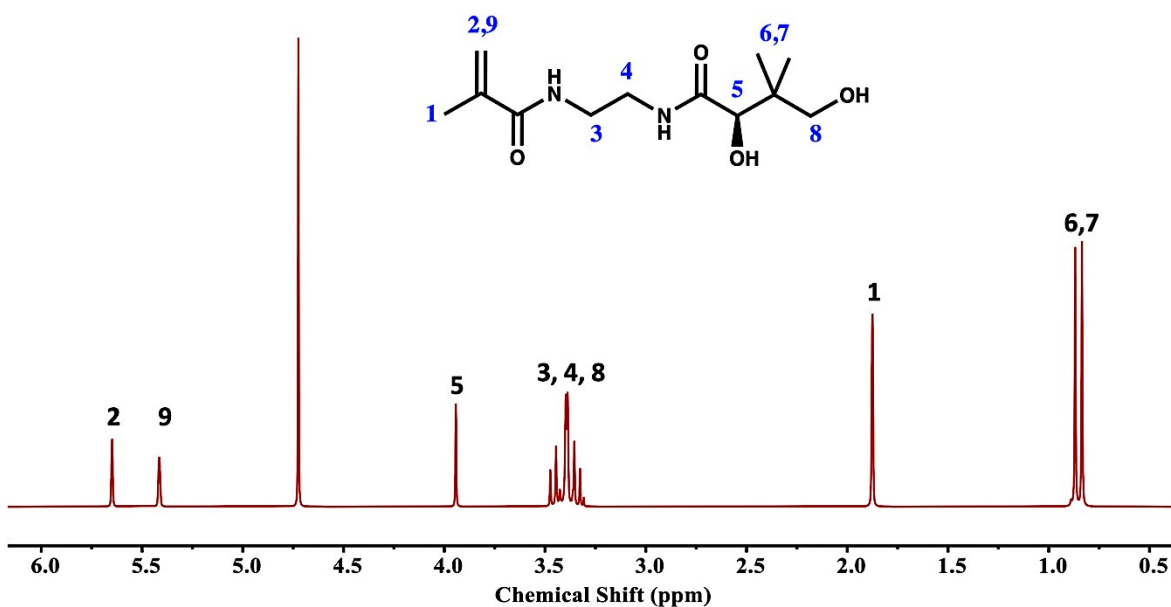

Figure S1. <sup>1</sup>H NMR spectrum of the B5AMA monomer

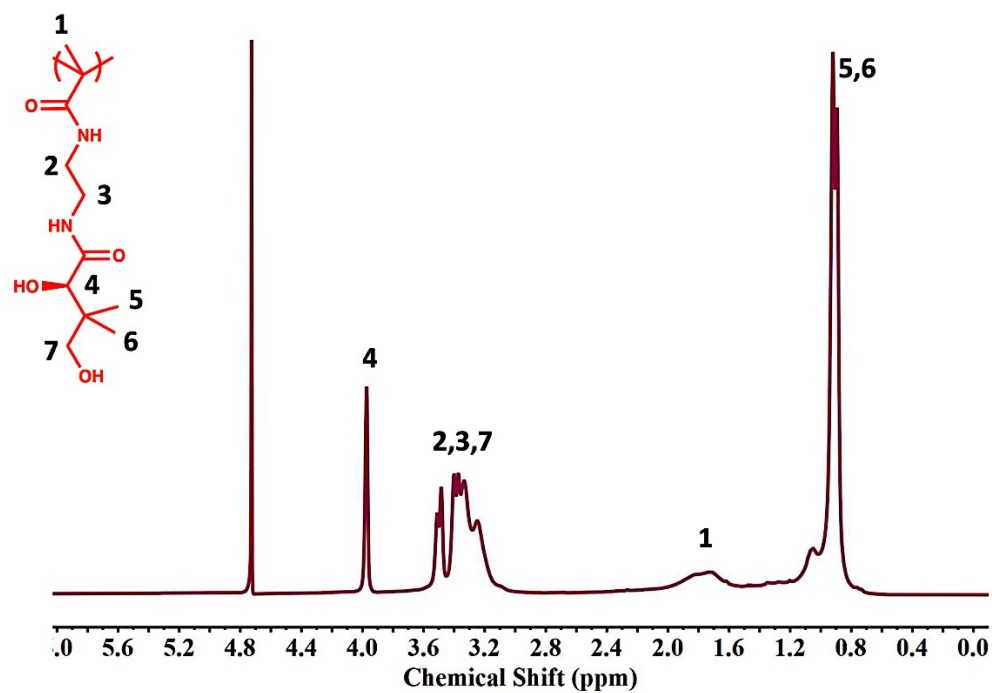

Figure S2. <sup>1</sup>H NMR spectrum of the poly (B5AMA) polymer

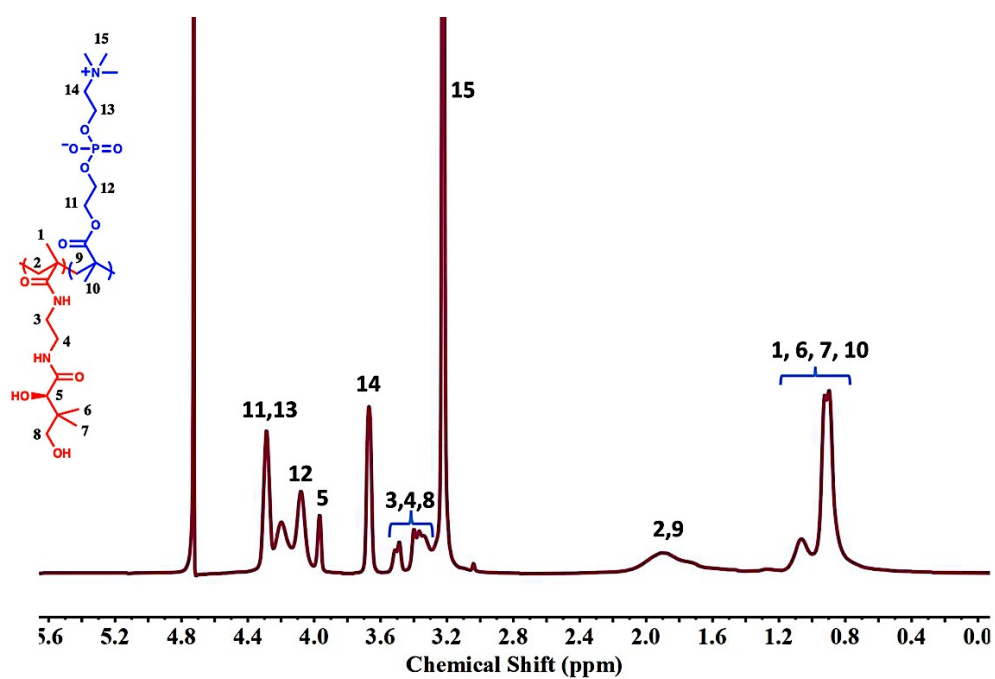

Figure S3. <sup>1</sup>H NMR spectrum of the zwitterionic poly (MPC-*st*-B5AMA) polymer

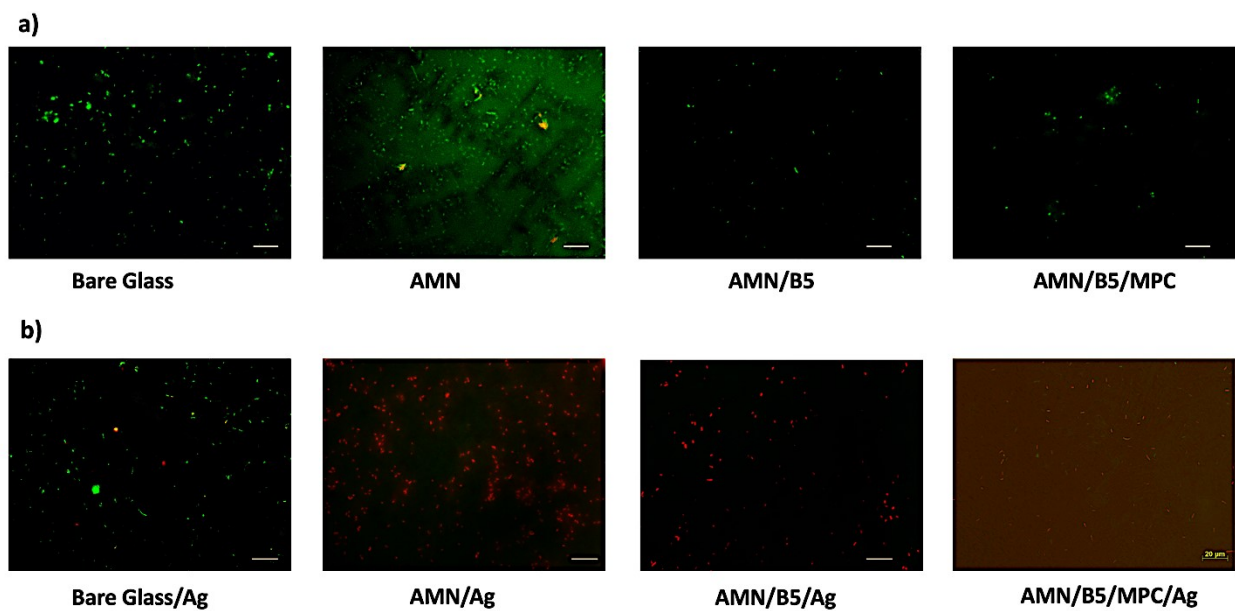

Figure S4. Fluorescence images of *E. coli* adhesion on a) modified surfaces (Bare Glass, AMN, AMN/B5, and AMN/B5/MPC). And b) AgNPs deposited modified surfaces (Bare Glass/Ag, AMN/Ag, AMN/B5/Ag, and AMN/B5/MPC/Ag). Scale bar 20 $\mu$ m.

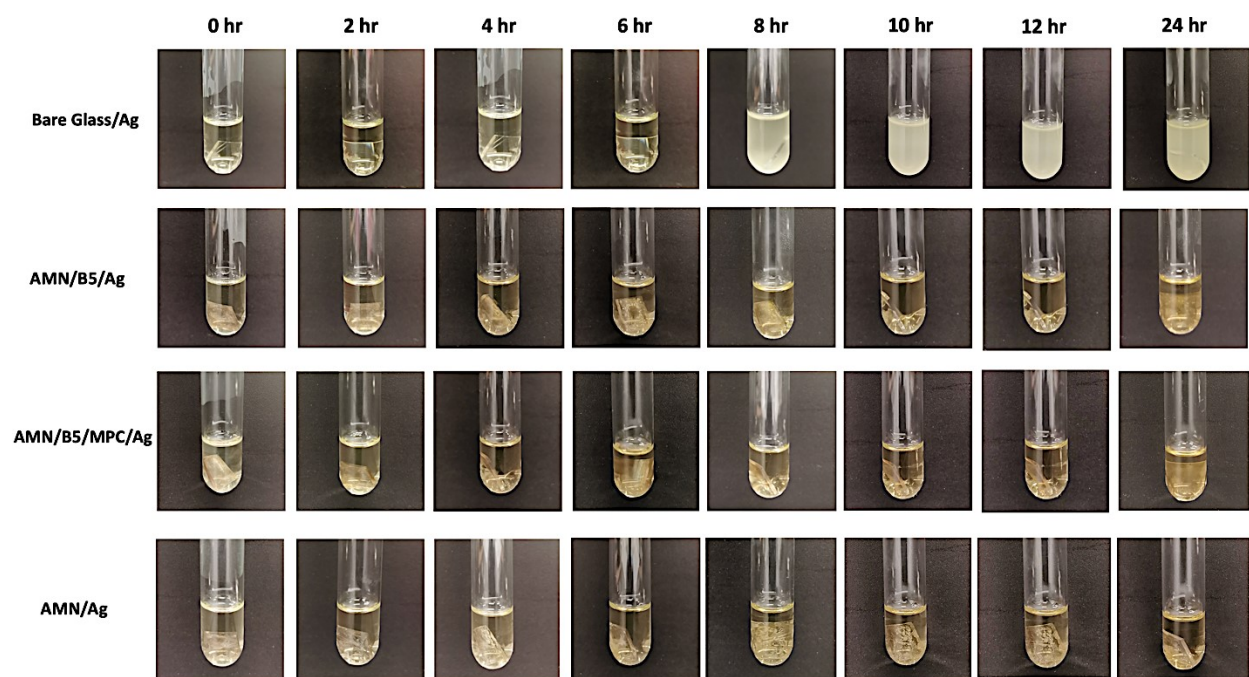

Figure S5. *S. aureus* bacterial suspension media in contact with different coated samples
